# Supplementary material for: Self-assembly of [PNbxW12−xO40]n−Keggin anions – a simple way to mixed Nb–W polyoxometalates
Source: Royal Society of Chemistry journal article supplement (doi:10.1039/c6nj02637k), 2016-11-10

## Self-assembly of $[\text{PNb}_x\text{W}_{12-x}\text{O}_{40}]^n$ -Keggin anions—a simple way to mixed Nb-W polyoxometalates.

Pavel A. Abramov<sup>\*1,2</sup>, Alexandra A. Shmakova<sup>1,2</sup>, Mohamed Haouas<sup>\*3</sup>, Gerhard Fink<sup>3</sup>, Emmanuel Cadot<sup>3</sup>, Maxim N. Sokolov<sup>1,2</sup>

<sup>1</sup>Nikolaev Institute of Inorganic Chemistry SB RAS, Novosibirsk, Russia, 630090.

E-mail: [abramov@niic.nsc.ru](mailto:abramov@niic.nsc.ru)

<sup>2</sup>Novosibirsk State University, Novosibirsk, Russia, 630090.

<sup>3</sup>Lavoisier Institute of Versailles, UMR CNRS 8180, University of Versailles Saint-Quentin en Yvelines, 45 avenue des Etats-Unis, 78035 Versailles, France.

E-mail: [mohamed.haouas@uvsq.fr](mailto:mohamed.haouas@uvsq.fr)

---

### SUPPORTING INFORMATION

---

- SI-1. Matlab code (Topo\_MH) to compute isomers in the series  $[\text{PNb}_x\text{W}_{12-x}\text{O}_{40}]^{(3+x)-}$ .**
- SI-2. How to use Topo\_MH.**
- SI-3. Example for  $x = 2$ ,  $[\text{PNb}_2\text{W}_{10}\text{O}_{40}]^{5-}$ .**

**SI-1. Matlab code (Topo\_MH) to compute isomers in the series  $[\text{PNb}_x\text{W}_{12-x}\text{O}_{40}]^{(3+x)-}$ .**

```
%% topo_MH.m

topology_Keggin_alpha

N= size(topo,1);
temp=zeros(1,N);
temp2= 0;
for in2=1:size(topo,2),
    for in=1:N, temp(in)= numel(topo{in,in2}); end;
    temp2= [temp2,max(temp)];
end;
N2= 1+ sum(temp2);

N_Niob=7;
wert= [1:N_Niob]; wert(end)=wert(end)-1;

q=[]; while(wert(1)==1), wert= counter( wert ,N); q=[q;wert];end;
liste_start= q(1:end-1,:);
N_liste= size(liste_start,1);

res1= zeros(N_liste,N);
res2= zeros(N_liste,N);
res3= zeros(N_liste,1);
res4= zeros(N,N2,N_liste);
for in1=1:N_liste,

    rang_in= ones(1,N); rang_in( liste_start(in1,:) )=2;
```

```

rang_matrix = topo_extended_ordnen( topo ,rang_in);
rang_out=   rang_matrix(:,1);
rang_sorted= sort(rang_out);
N_groups=   numel(unique(rang_out));

res1(in1,:)= rang_in;
res2(in1,:)= rang_sorted;
res3(in1,1)= N_groups;
%%GF: res4(:,in1)= sortrows( rang_matrix );
res4(:,in1)= rang_matrix;

end;

%Finde Wiederholungen:
%-----
ist_wiederholung_von= zeros(N_liste,1);
gruppen= cell(0);
count=0;

for in1=1:N_liste-1,
    if( ist_wiederholung_von(in1) ), continue; end;
    ;
    count= count+1;
    gruppen{count}= [in1];
    u1= topo_extended_ordnen( topo ,res1(in1,:) ,res1(in1,:));
    for in2= in1+1:N_liste,
        if( res3(in1) ~=res3(in2) ), continue; end;
        if(~all(res2(in1,:)==res2(in2,:)) ), continue; end;
    ;

```

```

u2= topo_extended_ordnen( topo ,res1(in1,:) ,res1(in2,:));;
if(all(u1(1:N,:)==u2(1:N,:))),
    'identisch';
    ist_wiederholung_von(in2)= in1;
    gruppen{count}= [gruppen{count} ,in2];
else,
    'unterschiedlich';
end;
end;
end;

Ng=numel(gruppen);
anzahl_gruppen_mitglieder=zeros(Ng,1); for in=1:Ng, anzahl_gruppen_mitglieder(in)= numel( gruppen{in}); end;
[anzahl_gruppen_mitglieder ,index]= sort(anzahl_gruppen_mitglieder);
gruppen= gruppen(index);
anzahl= anzahl_gruppen_mitglieder;

%Betrachten einzelner Gruppen:

figure()
posi=[100,100,870,615]; set(gcf,'Position',posi);

if( size(liste_start,2)==2), felder=4; anzahl2=anzahl;
elseif( size(liste_start,2)==3), felder=6; anzahl3=anzahl;
elseif( size(liste_start,2)==4), felder=8; anzahl4=anzahl;
elseif( size(liste_start,2)==5), felder=12; anzahl5=anzahl;
elseif( size(liste_start,2)==6), felder=12; anzahl6=anzahl;

```

```

else                felder=16,,
end;

%%%%%%%%%%%%

if(true),

for ing=1:Ng,
    clf
    N_molecules= numel(gruppen{ing} );
    for in1=1:N_molecules,
        index_auswahl= find(1<res1(gruppen{ing}(in1) ,: ) );

        if( felder==4), subplot(2,2,in1);
        elseif(felder==6), subplot(2,3,in1);
        elseif(felder==8), subplot(3,3,in1);
        elseif(felder==12),subplot(3,4,in1);
        else,          subplot(4,4,in1);
        end;
        mache_diagram
        title(['Group: ',num2str(ing)]);
    end;
    if(ing<10), filename=['group_0',num2str(ing)];
    else,    filename=['group_',num2str(ing)];
    end;
    print( gcf, '-djpeg' ,filename );
end;

%%%%%%%%%%%%

end;

```

## **SI-2. How to use topo\_MH.**

- 1- open matlab software and go to the program location (For example C:\Programs\Matlab7\work\Topo)
- 2- Edit the program ("edit topo\_MH") and enter the Nb of Nb atom line 14: "N\_Niob=n" and then save the file
- 3- run the program ("topo\_MH")
- 4- As a result (output) figures (jpeg) will be created in the folder (C:\Programs\Matlab7\work\Topo) have to be moved (otherwise will be erased next time !!) and some figures will appear (2 in all the first and the last results)
- 5- To obtain the multiplicity tape "gruppen"

SI-3. Example for  $x = 2$ ,  $[\text{PNb}_2\text{W}_{10}\text{O}_{40}]^{5-}$ .

Group: 1

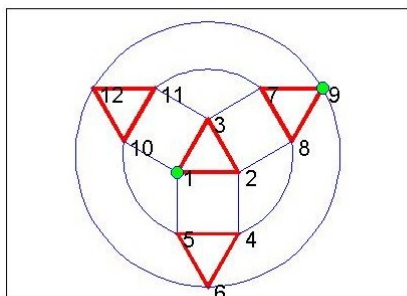

Group: 2

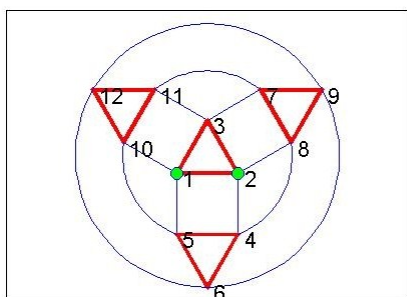

Group: 2

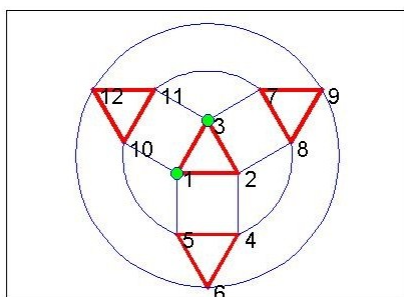

Group: 3

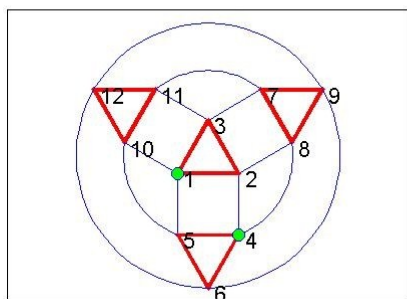

Group: 3

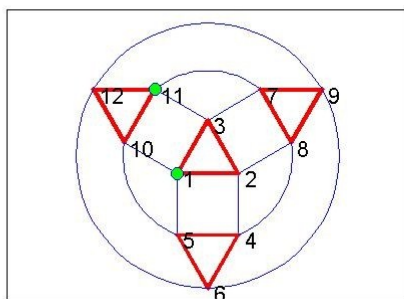

Group: 4

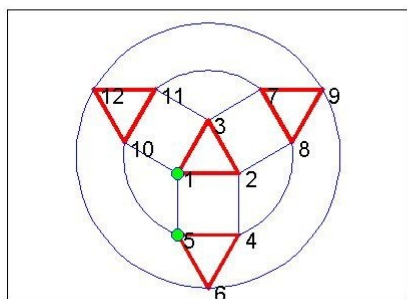

Group: 4

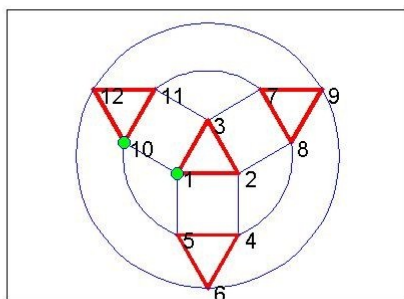

Group: 5

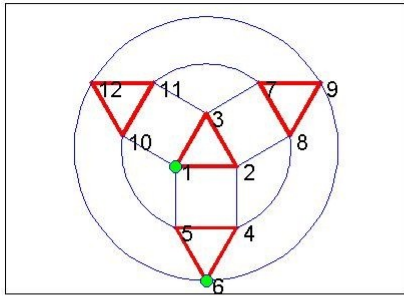

Group: 5

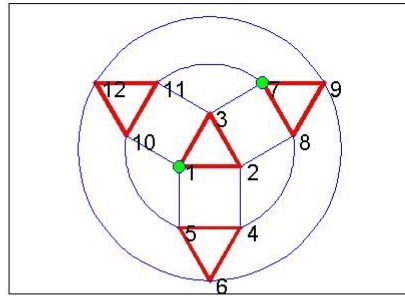

Group: 5

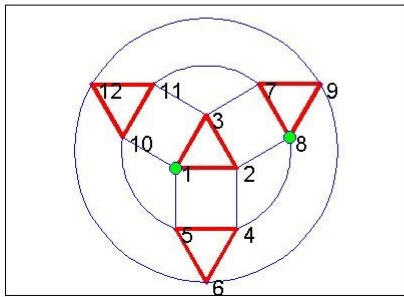

Group: 5

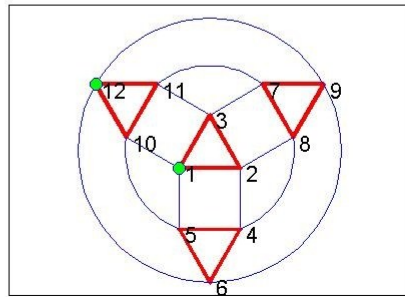

Supplement: c6nj02637k1.pdf [file c6nj02637k1.pdf]
